# Supplementary material for: Machine Learning Framework for Longitudinal Functional Decline and Time-to-Event Prediction
Source: Research Square preprint supplement (doi:10.21203/rs.3.rs-6717675/v1), 2025-06-03
Supplement: Supplementary file 1 [file 04d6f90dbb5c497499eef587.xlsx]

## Sheet: No Imputation
test_rotation	method	dataset	Cindex_mean	Cindex_lb	Cindex_ub	MedianAE_mean	MedianAE_lb	MedianAE_ub	MAE_train	MAE_test	MAE_train_uncensored	MAE_test_uncensored	MedianAE_train	MedianAE_test	MedianAE_train_uncensored	MedianAE_test_uncensored	PredIn90_train	PredIn90_test	PredIn90_train_uncensored	PredIn90_test_uncensored	n_features	n_patients	processed	elapsed_time	elapsed_time_bootstrap	n_bootstraps	bootstrap_frac
ArQ	XGBoostMAEPOReg	classes_neqm	0.73933	0.724145	0.754516	193.166	186.157	200.175	128.87	657.959	86.7383	393.855	76.4676	290.482	55.6426	193.083	0.560022	0.189121	0.688674	0.260753	5	8584	2025-03-12 09:09:41	79.236	704.15	100	0.8
PROACT	XGBoostMAEPOReg	classes_neqm	0.689927	0.682908	0.696946	209.68	199.977	219.383	68.5346	439.844	33.5082	310.386	8.8847	315.964	6.45181	208.762	0.884577	0.166577	0.949946	0.243802	5	8584	2025-03-12 09:11:05	62.1148	1262.32	100	0.8
IDPP	XGBoostMAEPOReg	classes_neqm	0.693414	0.680497	0.70633	220.539	206.634	234.445	204.926	571.919	157.332	366.85	127.832	338.669	103.516	220.281	0.369072	0.158305	0.449431	0.226691	5	8584	2025-03-12 09:09:41	68.7153	728.491	100	0.8
IDPP	XGBoostMAEPOReg	demo	0.689519	0.67742	0.701618	244.249	233.974	254.525	237.462	552.308	218.659	380.545	171.804	350.419	166.624	244.116	0.288218	0.137124	0.266119	0.191956	9	8584	2025-03-12 09:00:23	102.812	1151.89	100	0.8
ArQ	XGBoostCox	demo	0.728622	0.714342	0.742903	274.9	257.016	292.784	1847.83	2042.84	381.464	395.191	1967	1717	314	275	0.0341048	0.051046	0.143426	0.163978	9	8584	2025-03-12 08:58:50	10.6132	762.298	100	0.8
PROACT	SkSurvCoxLinear	classes_neqm	0.676071	0.664076	0.688066	288.745	272.981	304.509	1351.36	1343.13	882.683	696.736	1003	985	469	289	0.0837179	0.0801272	0.15283	0.184795	5	4662	2025-03-12 08:58:50	10.1258	579.389	100	0.8
ArQ	XGBoostCox	classes_neqm	0.765914	0.753459	0.77837	295.07	278.349	311.791	1959.72	2182.78	381.32	417.656	2122	1912	345	294.5	0.0236839	0.0502092	0.0996016	0.16129	5	8584	2025-03-12 08:58:51	10.9295	767.317	100	0.8
PROACT	XGBoostCox	classes_neqm	0.752653	0.745809	0.759498	305.205	298.494	311.916	2010.86	1769.8	427.837	327.991	1750	1819	354	305	0.0287722	0.0300268	0.09358	0.138843	5	8584	2025-03-12 09:07:35	8.89016	585.909	100	0.8
ArQ	XGBoostMAEPOReg	demo	0.691687	0.675129	0.708246	333.73	308.67	358.789	177.086	647.467	151.186	456.409	111.975	384.665	105.488	331.46	0.429963	0.102929	0.451338	0.112903	9	8584	2025-03-12 09:00:32	112.232	1051.08	100	0.8
ArQ	SkSurvCoxLinear	classes_neqm	0.673539	0.653112	0.693965	344.505	288.114	400.896	870.931	955.74	476.221	655.869	744	714	285	351	0.0899417	0.102098	0.201578	0.180328	5	4662	2025-03-12 08:58:51	10.6563	672.68	100	0.8
PROACT	XGBoostMAEPOReg	demo	0.614136	0.605663	0.622609	352.217	339.687	364.746	6.96723	807.004	6.26821	577.073	3.35754	552.805	2.99915	352.988	0.998662	0.0977659	0.997824	0.150413	9	8584	2025-03-12 09:00:11	90.6441	1788.12	100	0.8
IDPP	SkSurvCoxLinear	demo	0.539616	0.519759	0.559473	414.55	391.241	437.859	662.616	744.464	444.475	586.351	566	592	331	414	0.0773694	0.0872038	0.135895	0.13881	9	4674	2025-03-12 08:58:49	9.55733	570.919	100	0.8
PROACT	XGBoostCox	demo	0.613992	0.605556	0.622429	418.535	407.179	429.891	1743.3	1645.79	532.596	458.317	1387	1713	440	419.5	0.0234192	0.0168007	0.0761697	0.077686	9	8584	2025-03-12 08:58:50	10.35	668.11	100	0.8
IDPP	SkSurvCoxLinear	classes_neqm	0.558217	0.534249	0.582186	430.97	400.172	461.768	869.576	979.62	459.825	699.577	749.5	772.5	278	427.5	0.0901554	0.0773067	0.2202	0.129371	5	4662	2025-03-12 08:58:53	12.8373	721.208	100	0.8
PROACT	SkSurvCoxLinear	demo	0.538594	0.524599	0.552588	436.19	412.311	460.069	1085.82	1083.28	739.677	780.253	871	902	451.5	438	0.0781742	0.0520231	0.126959	0.108696	9	4674	2025-03-12 08:58:49	9.15086	514.116	100	0.8
IDPP	XGBoostCox	demo	0.679106	0.667372	0.690841	437.45	425.681	449.219	1996.92	1857.39	420.465	515.238	2107.5	1632.5	362.5	438	0.0251841	0.0245262	0.108091	0.0804388	9	8584	2025-03-12 08:58:51	11.6649	767.971	100	0.8
ArQ	SkSurvCoxLinear	demo	0.604695	0.581189	0.6282	445.29	414.058	476.522	806.285	919.165	531.406	620.544	619	646	354	441	0.0763798	0.06698	0.133921	0.0912281	9	4674	2025-03-12 08:58:51	11.2831	672.935	100	0.8
IDPP	XGBoostCox	classes_neqm	0.710179	0.70014	0.720219	450.165	439.612	460.718	2165.9	2128.72	423.274	572.333	2348.5	2032	391.5	449	0.0150221	0.0245262	0.0644753	0.0804388	5	8584	2025-03-12 08:58:51	10.9997	779.158	100	0.8

## Sheet: MICE
test_rotation	method	dataset	Cindex_mean	Cindex_lb	Cindex_ub	MedianAE_mean	MedianAE_lb	MedianAE_ub	PredIn90_mean	PredIn90_lb	PredIn90_ub	MAE_train	MAE_test	MAE_train_uncensored	MAE_test_uncensored	MedianAE_train	MedianAE_test	MedianAE_train_uncensored	MedianAE_test_uncensored	PredIn90_train	PredIn90_test	PredIn90_train_uncensored	PredIn90_test_uncensored	n_features	n_patients	processed	elapsed_time	elapsed_time_bootstrap	n_bootstraps	bootstrap_frac
ArQ	SkSurvCoxLinear	demo	0.606873	0.581292	0.632455	442.95	412.865	473.035	0.0907943	0.0753973	0.106191	806.285	919.165	531.406	620.544	619	646	354	441	0.0763798	0.06698	0.133921	0.0912281	9	4674	##########	34.4278	854.886	100	0.8
IDPP	SkSurvCoxLinear	demo	0.541394	0.52178	0.561008	412.345	387.977	436.713	0.140228	0.120227	0.160228	662.616	744.464	444.475	586.351	566	592	331	414	0.0773694	0.0872038	0.135895	0.13881	9	4674	##########	29.1666	726.933	100	0.8
PROACT	SkSurvCoxLinear	demo	0.538681	0.524735	0.552627	435.82	408.626	463.014	0.10912	0.0988345	0.119406	1085.82	1083.28	739.677	780.253	871	902	451.5	438	0.0781742	0.0520231	0.126959	0.108696	9	4674	##########	30.5366	663.883	100	0.8
ArQ	XGBoostCox	demo	0.741882	0.729415	0.754349	262.605	242.178	283.032	0.158402	0.139515	0.177288	1840.01	2027.41	381.49	383.417	1954	1700	325	262.5	0.030586	0.0493724	0.128628	0.158602	9	8584	##########	63.1954	1046.18	100	0.8
IDPP	XGBoostCox	demo	0.678566	0.667471	0.68966	447.72	434.911	460.529	0.0659052	0.0550646	0.0767458	1991.26	1817.62	420.835	508.868	2116	1616.5	366.5	449	0.0251841	0.0200669	0.108091	0.0658135	9	8584	##########	140.34	1018.37	100	0.8
PROACT	XGBoostCox	demo	0.639029	0.630102	0.647955	433.1	422.311	443.889	0.0783584	0.0712496	0.0854673	1738.64	1733.2	522.483	471.273	1380	1797	427	434	0.0224155	0.0168007	0.0729053	0.077686	9	8584	##########	146.68	871.793	100	0.8
ArQ	XGBoostMAEPOReg	demo	0.715036	0.699589	0.730483	304.124	282.477	325.771	0.128146	0.110064	0.146229	178.452	625.821	151.446	417.343	116.488	361.105	106.763	303.144	0.415753	0.12887	0.440524	0.129032	9	8584	##########	224.251	1128.67	100	0.8
IDPP	XGBoostMAEPOReg	demo	0.697512	0.68566	0.709364	232.598	219.804	245.393	0.247328	0.229009	0.265647	239.763	511.726	222.393	328.561	171.629	327.784	169.056	235.581	0.289102	0.158863	0.266751	0.246801	9	8584	##########	260.683	1125.8	100	0.8
PROACT	XGBoostMAEPOReg	demo	0.602671	0.593774	0.611568	329.612	317.6	341.625	0.16437	0.15365	0.17509	8.18748	801.291	6.89581	549.273	4.41803	493.216	4.23291	330.557	0.998662	0.110098	0.998912	0.164463	9	8584	##########	249.64	1724.78	100	0.8
ArQ	SkSurvCoxLinear	classes_neqm	0.675525	0.655077	0.695972	345.035	288.52	401.55	0.183237	0.162223	0.204252	870.931	955.74	476.221	655.869	744	714	285	351	0.0899417	0.102098	0.201578	0.180328	5	4662	##########	80.2945	849.014	100	0.8
IDPP	SkSurvCoxLinear	classes_neqm	0.556081	0.533702	0.578459	429.17	395.153	463.187	0.129838	0.110766	0.14891	869.576	979.62	459.825	699.577	749.5	772.5	278	427.5	0.0901554	0.0773067	0.2202	0.129371	5	4662	##########	82.2252	922.454	100	0.8
PROACT	SkSurvCoxLinear	classes_neqm	0.676587	0.665012	0.688162	287.52	273.705	301.335	0.185888	0.17465	0.197127	1351.36	1343.13	882.683	696.736	1003	985	469	289	0.0837179	0.0801272	0.15283	0.184795	5	4662	##########	77.0197	700.552	100	0.8
ArQ	XGBoostCox	classes_neqm	0.753161	0.739973	0.76635	320.49	298.902	342.078	0.102301	0.0856331	0.118969	1919.02	2146.09	370.442	428.116	2064	1831	326	319	0.0251725	0.0317992	0.105862	0.102151	5	8584	##########	682.394	656.679	100	0.8
IDPP	XGBoostCox	classes_neqm	0.699365	0.688508	0.710221	464.705	452.723	476.687	0.0746352	0.063742	0.0855284	2119.1	2111.73	409.331	570.552	2296.5	2148.5	380.5	464	0.0194403	0.022854	0.0834387	0.0749543	5	8584	##########	695.42	654.294	100	0.8
PROACT	XGBoostCox	classes_neqm	0.756407	0.750026	0.762788	310.6	303.843	317.357	0.118802	0.109801	0.127804	2009.94	1752.95	432.359	331.728	1735	1776	356	310	0.0277685	0.0257373	0.0903156	0.119008	5	8584	##########	461.109	264.503	100	0.8
ArQ	XGBoostMAEPOReg	classes_neqm	0.752534	0.739808	0.765261	179.559	161.943	197.175	0.261142	0.238542	0.283742	150.804	635.192	116.934	353.496	96.6372	284.985	76.9306	176.026	0.471376	0.190795	0.554923	0.263441	5	8584	##########	539.012	261.348	100	0.8
IDPP	XGBoostMAEPOReg	classes_neqm	0.677343	0.664927	0.689758	247.847	230.127	265.566	0.215918	0.197078	0.234758	208.145	621.155	166.407	407.875	134.155	371.018	114.709	249.04	0.351105	0.146042	0.40708	0.215722	5	8584	##########	520.597	279.773	100	0.8
PROACT	XGBoostMAEPOReg	classes_neqm	0.687829	0.678971	0.696686	208.829	199.451	218.208	0.261228	0.248505	0.273952	62.5227	454.617	35.0559	320.521	10.8408	321.128	7.65503	209.219	0.88993	0.157998	0.951034	0.261157	5	8584	##########	403.815	849.77	100	0.8
